# Supplementary material for: Synthesis of calcined LDHs materials decorated on ZnO nanorods: enhancing adsorption capacity and antibacterial activity
Source: Royal Society of Chemistry journal article supplement (doi:10.1039/d4va00413b), 2025-01-01

### Supplementary information

S.1. The schematic diagram of synthesis of ZnO/ZnCo-cLDHs by coprecipitation method

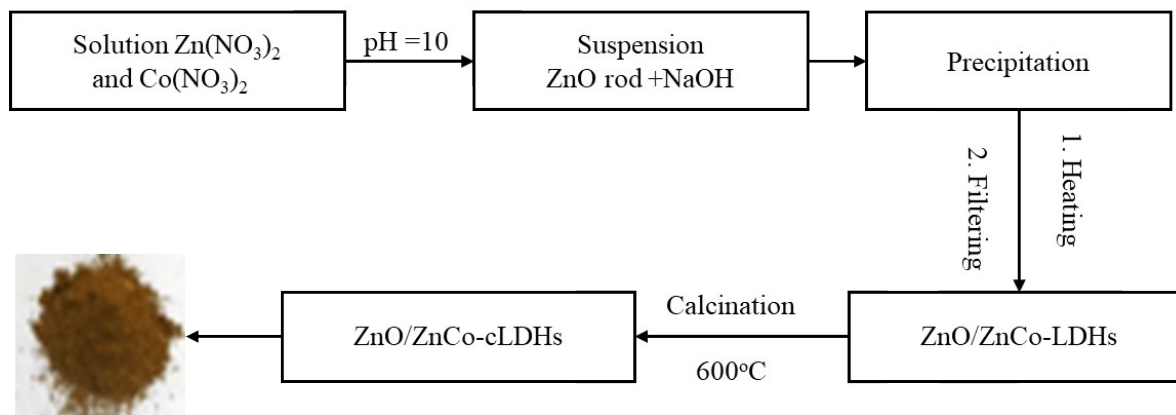

Supplement: d4va00413b1.pdf [file d4va00413b1.pdf]
